# Supplementary material
Source: PubMed Central journal article supplement (PMC3604623)

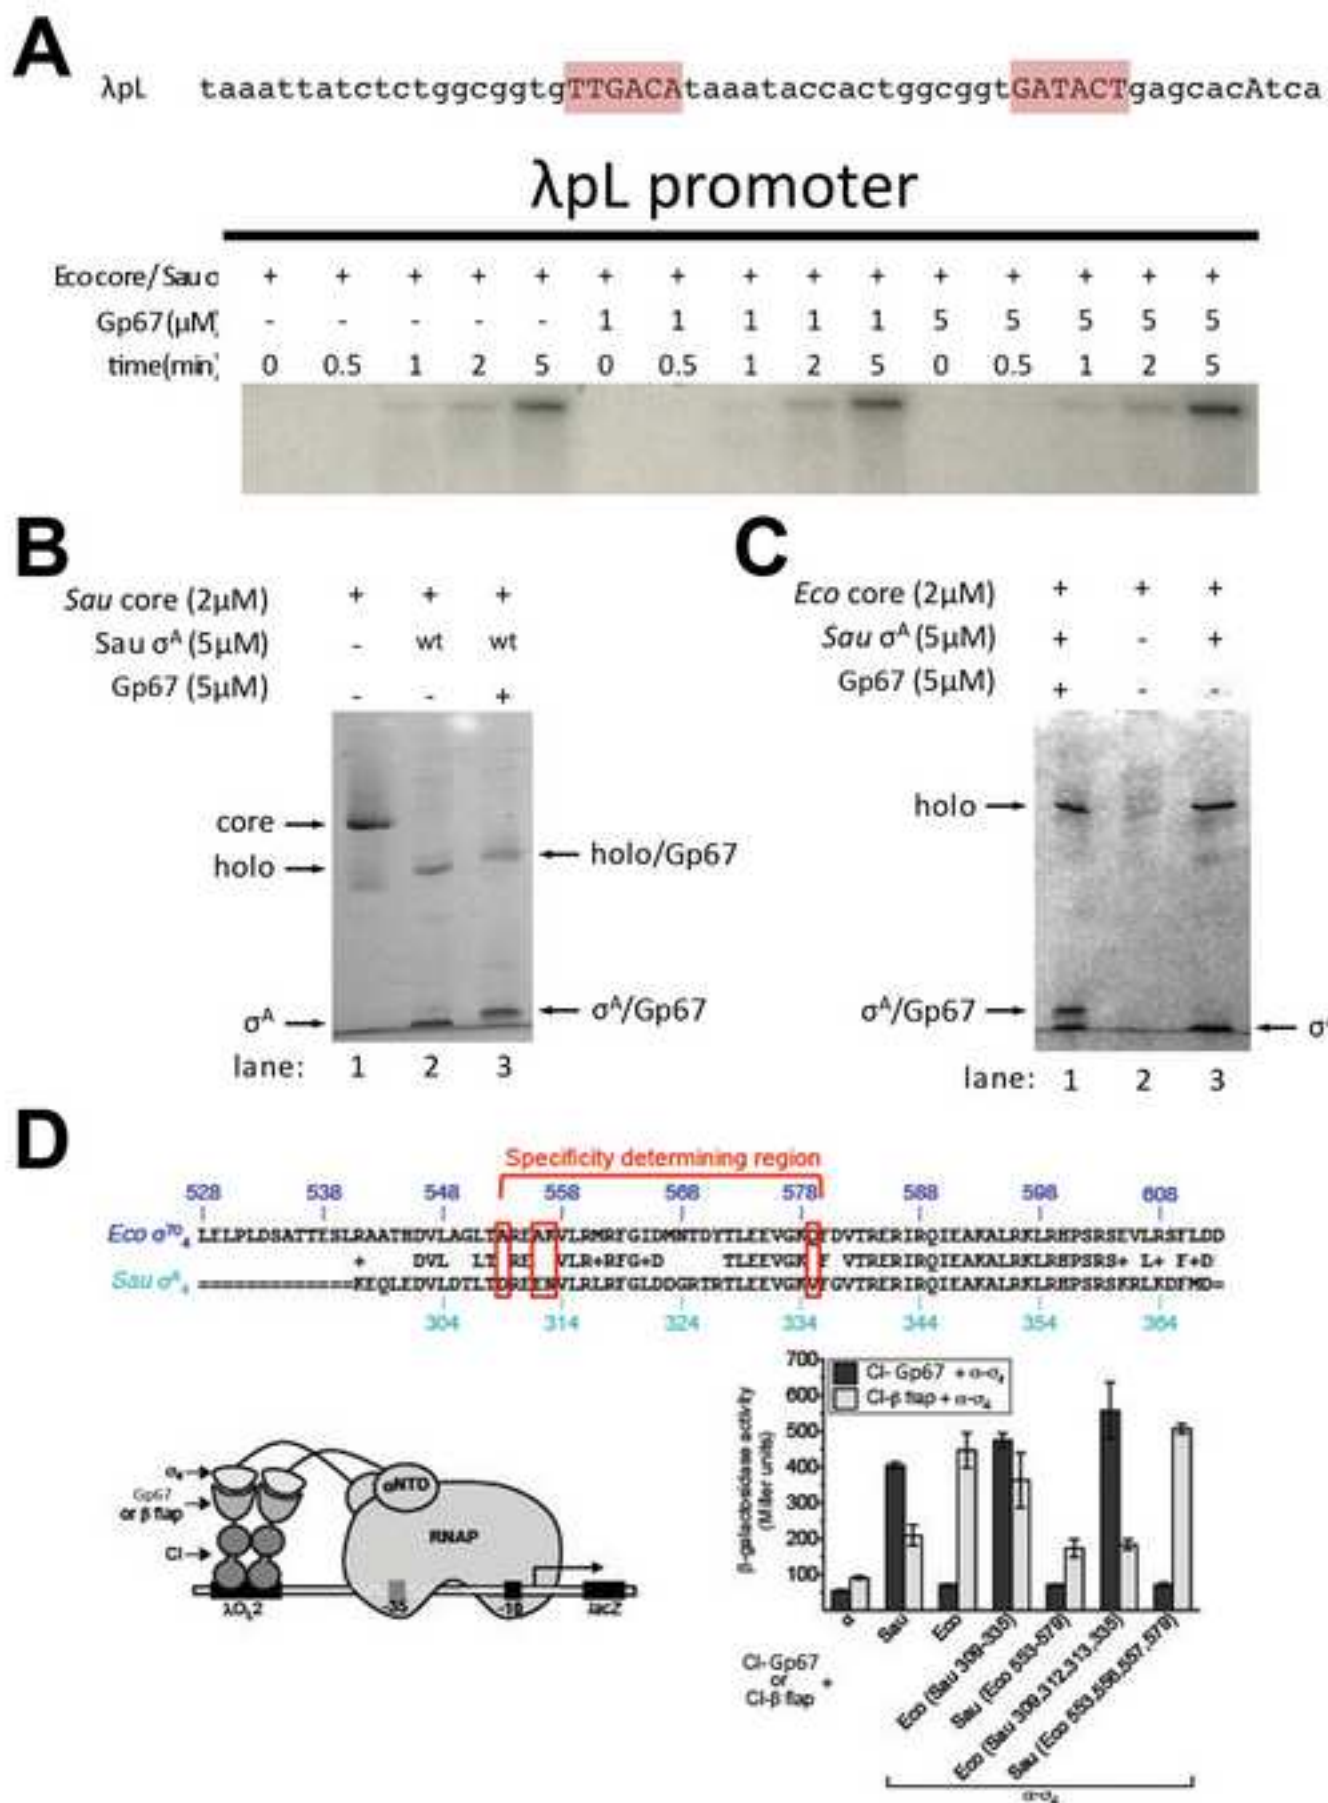

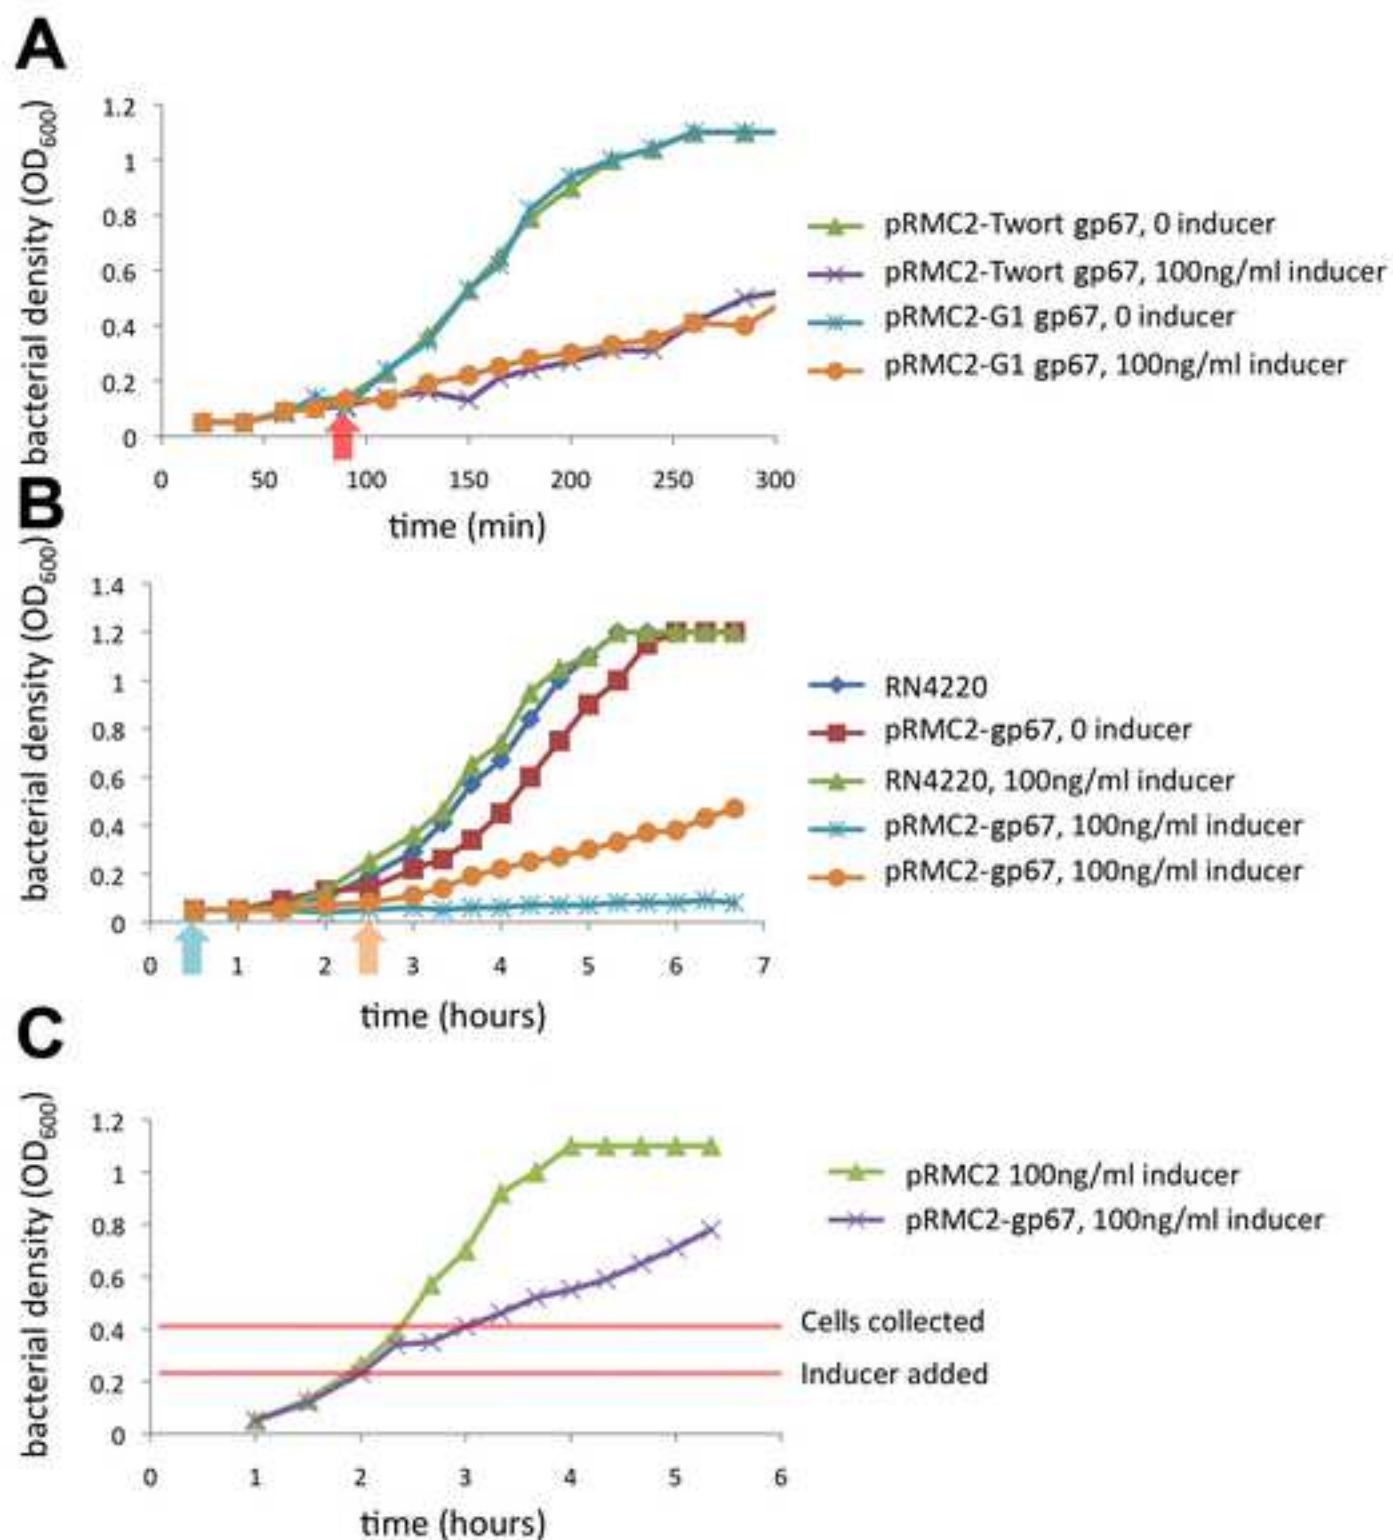

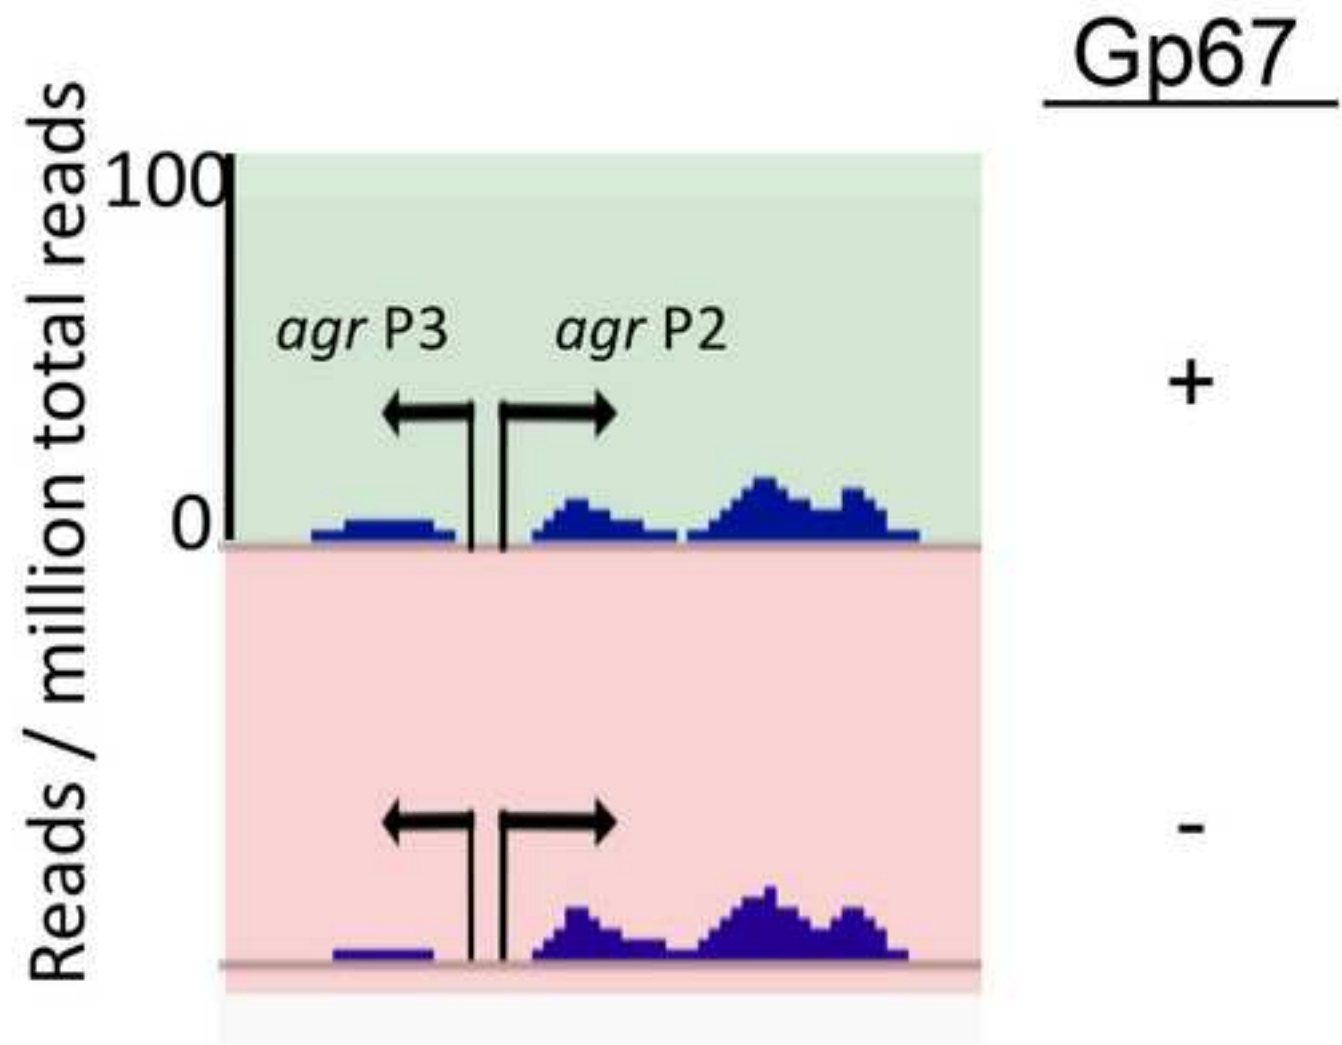

Osmundson et al., Figure S3

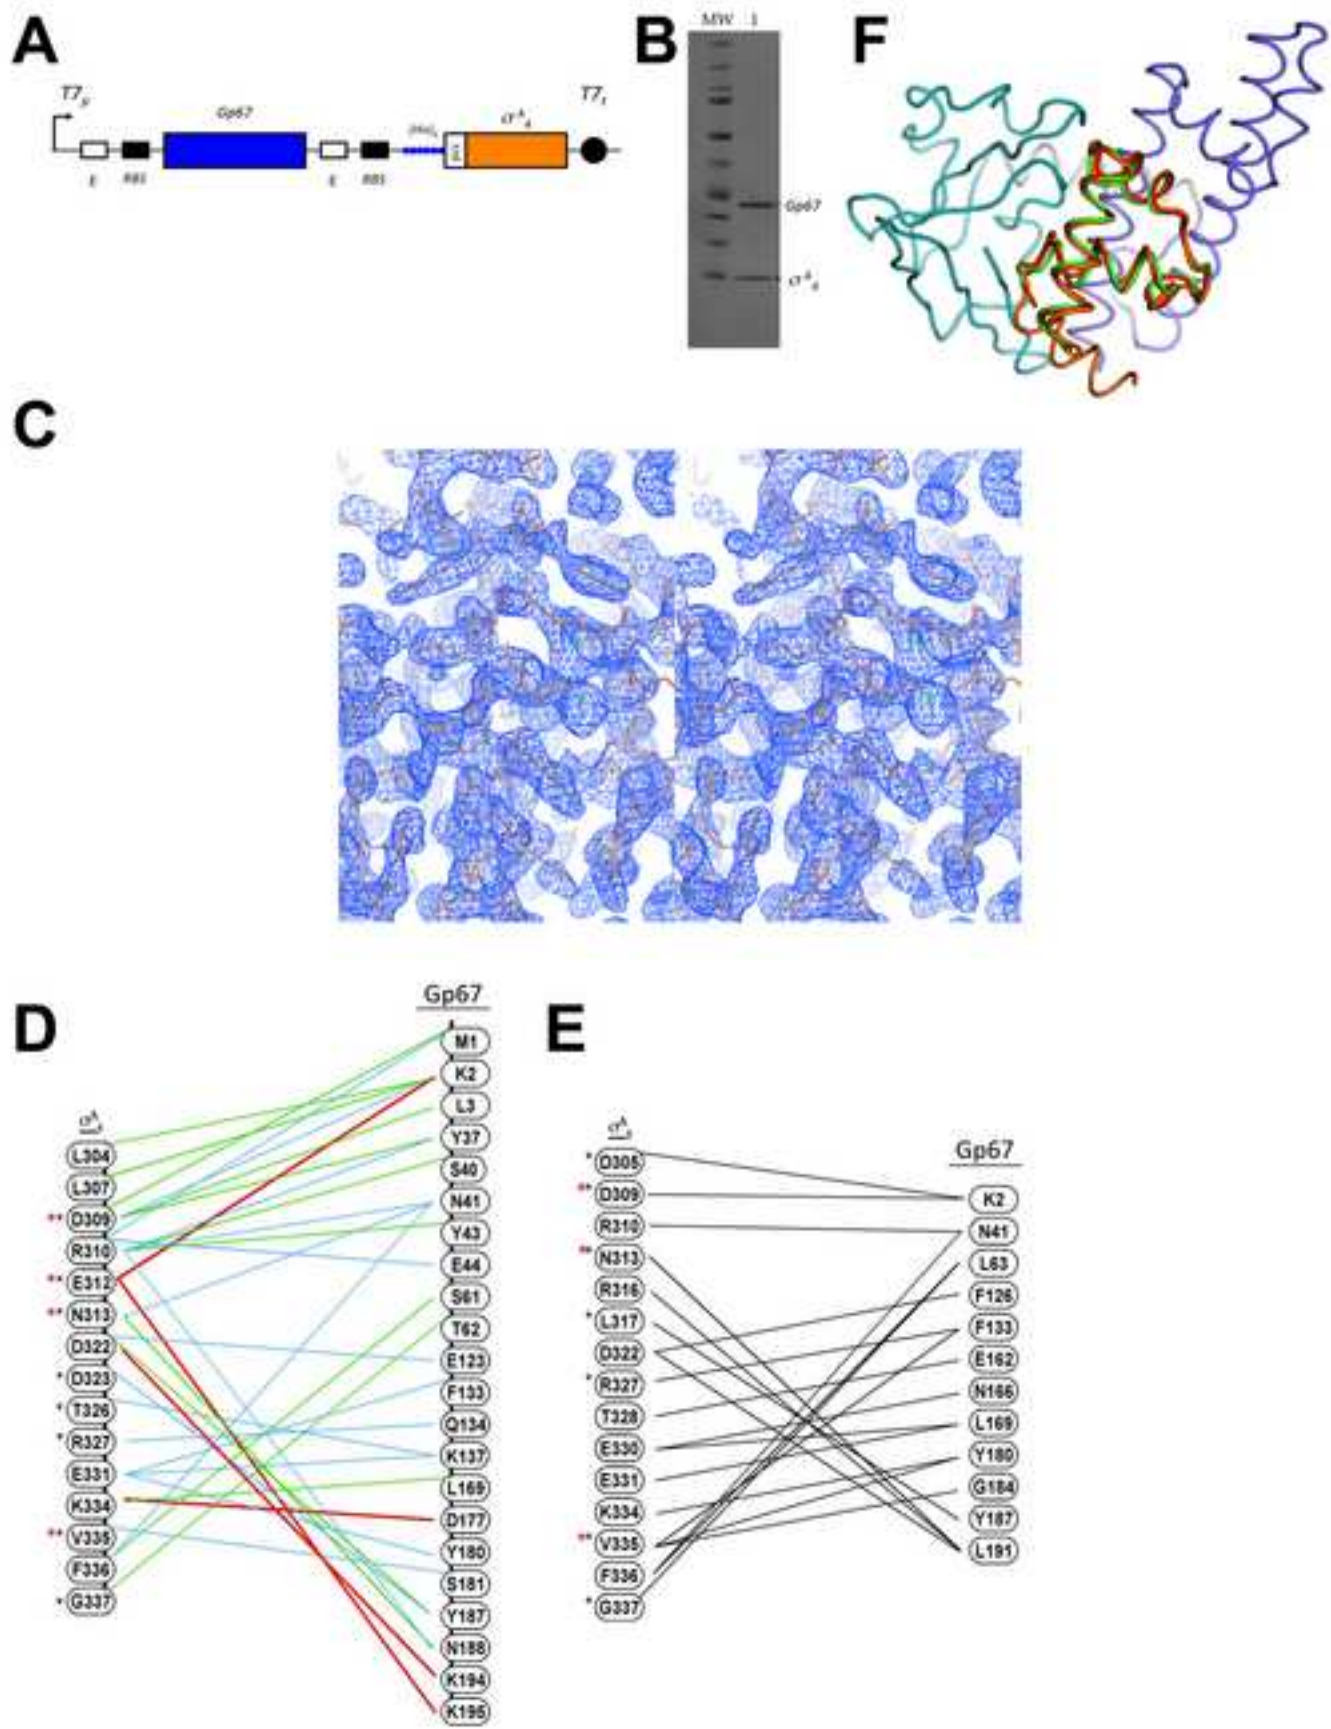

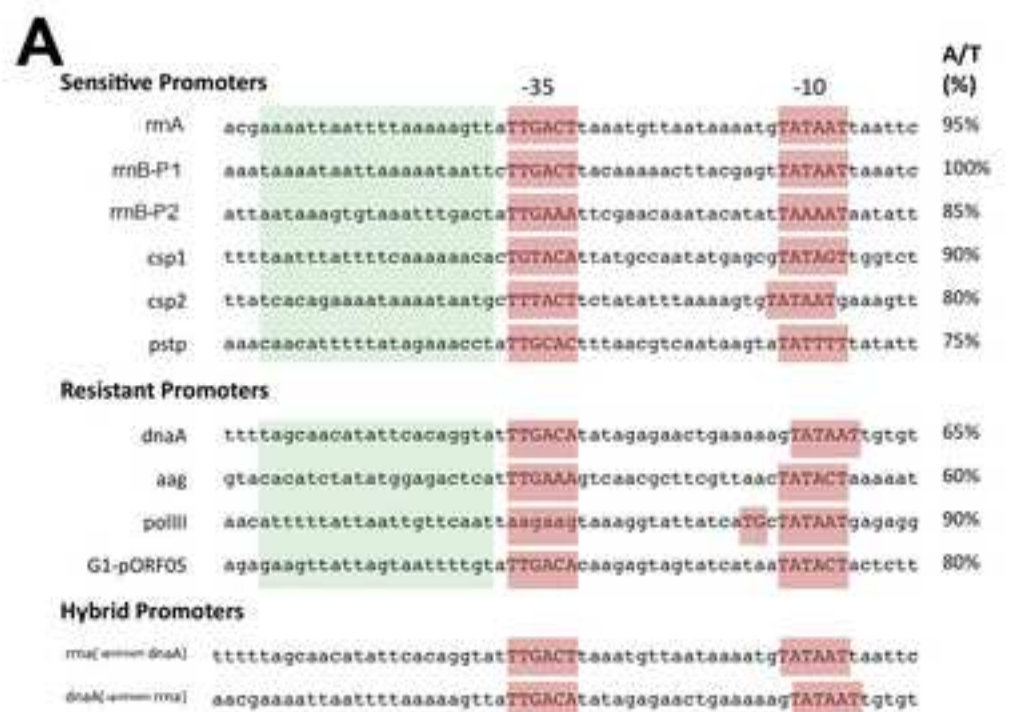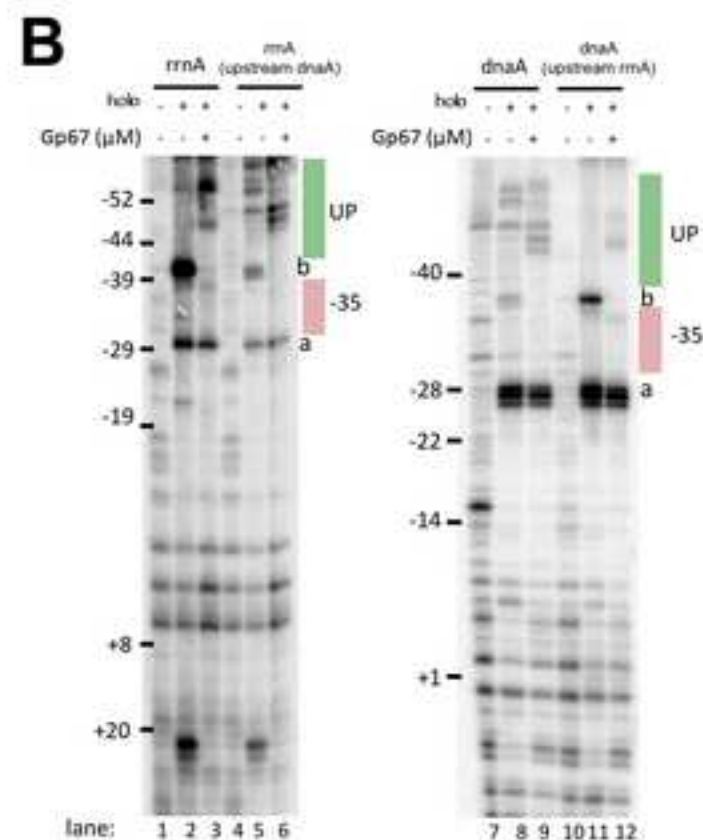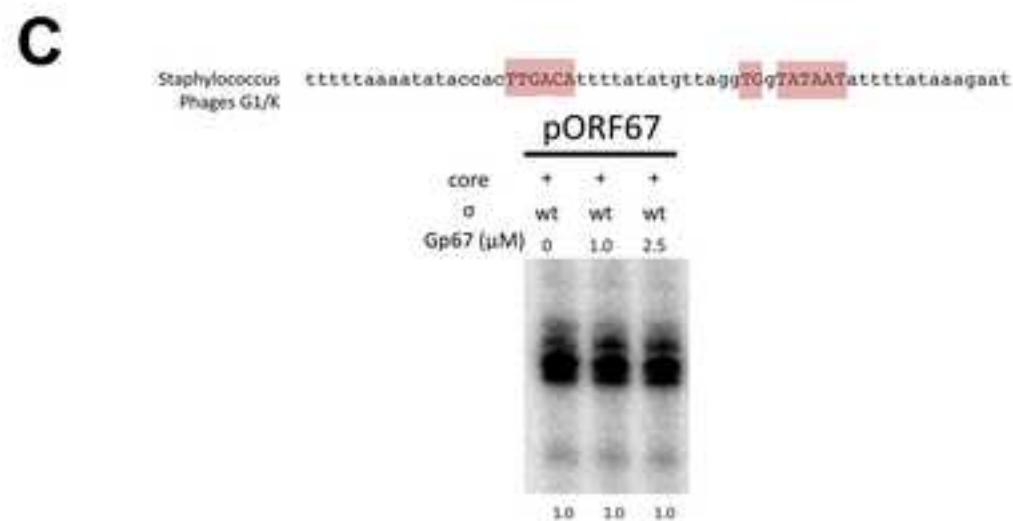

Supplement: NIHMS418371-supplement-02.pdf [file NIHMS418371-supplement-02.pdf]
